# Supplementary material
Source: publisher site journal article supplement (https://www.spandidos-publications.com/769/downloadSupplementary)
Supplement: Supplementary file 1 [file downloadSupplementary]

Table SIV. Predictions for open reading frames of the hsa\_circ\_0000977 and hsa\_circ\_0043278 using the cancer-specific circRNA database.

| circRNA ID       | Chrom | Start    | End      |
|------------------|-------|----------|----------|
| hsa_circ_0000977 | chr2  | 10789395 | 10814167 |
| hsa_circ_0000977 | chr2  | 10793424 | 10818400 |
| hsa_circ_0000977 | chr2  | 10801509 | 10826236 |
| hsa_circ_0000977 | chr2  | 10784458 | 10809185 |
| hsa_circ_0000977 | chr2  | 10792913 | 10817634 |
| hsa_circ_0000977 | chr2  | 10800347 | 10825068 |
| hsa_circ_0043278 | chr17 | 35799176 | 35802412 |

Chrom/chr, chromosome; hsa, Homo sapiens; circ, circular RNA.
